1 **Evidence for reduced immune gene diversity and activity during the evolution of**  
2 **termites**

3 Shulin He<sup>1,2,3</sup>, Thorben Sieksmeyer<sup>1,2</sup>, Yanli Che<sup>4</sup>, M. Alejandra Esparza Mora<sup>1,2</sup>, Petr Stiblik<sup>3</sup>,  
4 Ronald Banasiak<sup>2</sup>, Mark C. Harrison<sup>5</sup>, Jan Šobotník<sup>6</sup>, Zongqing Wang<sup>4</sup>, Paul R. Johnston<sup>1,7,8,†</sup>,  
5 Dino P. McMahon<sup>1,2,\*†</sup>

6  
7 <sup>1</sup> Institute of Biology, Freie Universität Berlin, Schwendenerstr. 1, 14195 Berlin, Germany.

8 <sup>2</sup> BAM Federal Institute for Materials Research and Testing, Department for Materials and  
9 Environment, Unter den Eichen 87, 12205 Berlin, Germany.

10 <sup>3</sup> Faculty of Forestry and Wood Science, Czech University of Life Science Prague, Kamýcká 129,  
11 16500 Prague, Czech Republic.

12 <sup>4</sup> College of Plant Protection, Southwest University, Tiansheng 2, 400175 Chongqing, China.

13 <sup>5</sup> Institute for Evolution and Biodiversity, University of Münster, Münster, Germany.

14 <sup>6</sup> Faculty of Tropical AgriSciences, Czech University of Life Science Prague, Kamýcká 129, 16500  
15 Prague, Czech Republic.

16 <sup>7</sup> Leibniz-Institute of Freshwater Ecology and Inland Fisheries (IGB), Müggelseedamm 310,  
17 12587 Berlin, Germany.

18 <sup>8</sup> Berlin Center for Genomics in Biodiversity Research, Königin-Luise-Str. 6-8, 14195 Berlin,  
19 Germany.

20 † These authors contributed equally.

21 \*Correspondence to: D. P. M. ([dino-peter.mcmahon@bam.de](mailto:dino-peter.mcmahon@bam.de)).

## 22 **Abstract**

23 The evolution of biological complexity is associated with the emergence of bespoke immune  
24 systems that maintain and protect organism integrity. Unlike the well studied immunity at the cell  
25 and individual level, little is known about the origins of immunity during the transition to eusociality,  
26 a major evolutionary transition comparable to the evolution of multicellular organisms from single-  
27 celled ancestors. We tackle this by characterizing the immune gene repertoire of 18 cockroach  
28 and termite species, spanning the spectrum of solitary, subsocial and eusocial lifestyles. We  
29 identified five significant immune gene family contractions and one immune gene family  
30 expansion along the spine of a time-calibrated phylogeny, correlating with key transitions in  
31 termite sociality. In cross-species comparisons of immune gene expression, we find that termites  
32 appear to have evolved a caste-specific social defense system at the expense of individual  
33 immune protection. Our study indicates that a major transition in organismal complexity entailed  
34 a fundamental reshaping of the immune system optimized for group over individual defense.

35

## 36 **Keywords**

37 Social insect, subsocial, cockroach, major transition, contraction, expansion

38

## 39 **Introduction**

40 The boundaries of individuality have been extended at different stages during the evolution of  
41 biological complexity, such as during the evolution of multicellular organisms from single-celled  
42 ancestors (Fisher et al., 2013; Michod and Herron, 2006; Pradeu, 2011; Smith and Szathmary,  
43 1997) and the evolution of eusocial animals from solitary ancestors. The fundamental increase of  
44 biological complexity has occurred multiple times in the most advanced animal societies,  
45 particularly among social insects including some bees, wasps, ants and termites, where the  
46 colony has become a dominant unit of selection (Boomsma and Gawne, 2018; Smith and  
47 Szathmary, 1997). Immunity is closely tied with these evolutionary transitions, because it is the  
48 immune system that defines the boundaries and threats of biological individuality, and is therefore  
49 essential for regulating organism integrity (Pradeu, 2011). The evolution of immunity has been  
50 well studied at the cell and individual level and efforts to widen understanding to social organisms  
51 have been made, such as in bees, thrips, and wasps (Barribeau et al., 2015; Hoggard et al.,  
52 2011a; Otani et al., 2016; Turnbull et al., 2010; Turnbull et al., 2012). But a comprehensive  
53 exploration of the evolution of immunity has hitherto been lacking during the transition to termite  
54 sociality. The termites, along with their nearest living cockroach relatives, represent an excellent  
55 system to explore the evolution of immunity due to the presence of a full spectrum of social  
56 organization.

57 Insect immunity has been studied at multiple levels in a small but growing number of insect  
58 models. The insect individual immune system has been extensively studied in flies (Hoffmann and  
59 Reichhart, 2002; Rolff and Reynolds, 2009) and comprises three principle immune pathways:  
60 immune deficiency (IMD), Toll and Janus kinase (JAK)-signal transducer and activator of  
61 transcription (STAT). These pathways are typified by pattern recognizing proteins, signaling  
62 molecules and effectors, which are responsive to and active against a wide range of insect  
63 pathogens. In addition to providing protection at the individual level, social insects have developed

64 a range of group-level social immune traits to protect colonies against infection (Cotter and Kilner,  
65 2010; Cremer et al., 2007; Cremer et al., 2018). Although social immunity has been the focus of  
66 much research in a range of social systems in recent years, the evolutionary origins of collective  
67 immune defense in social insects has received comparatively little attention. As a combination of  
68 traits, ranging from the secretion of antimicrobial compounds to the orchestration of time- and  
69 spatially-sensitive collective defenses (Stroeymeyt et al., 2018), the social immune system can  
70 be seen to act as a “distributed organ”, much like the conventional immune system of metazoan  
71 animals. As with the evolution of the metazoan immune system which is thought to have emerged  
72 via the co-option of pre-existing molecular modules and functions into novel defensive pathways,  
73 it has been hypothesized that social immune systems originated via similar processes (Pull and  
74 McMahon, 2020), with a potentially crucial role for behavioural (Harpur et al., 2019) as well as  
75 immune gene adaptations (He et al., 2018; Kutsukake et al., 2019). In line with this view, many  
76 genes, including immune-related genes, have been shown to display caste-specific expression  
77 patterns (Husseneder and Simms, 2014; Jones et al., 2017; Mitaka et al., 2017; Mitaka et al.,  
78 2016; Scharf et al., 2003). In addition, enhanced antimicrobial defenses have been recorded in  
79 some social insects compared with their solitary relatives (Hoggard et al., 2011b; Stow et al.,  
80 2007; Turnbull et al., 2011; Turnbull et al., 2012).

81 Immune gene components, particularly immune effectors, have been implicated in the evolution  
82 of social immunity. In termites, termicins, a defensin-like gene family, has been duplicated during  
83 the evolution of termites (Bulmer and Crozier, 2004), while gram-negative bacteria-binding  
84 proteins (GNBP) have acquired a novel fungicidal function in the common ancestor of eusocial  
85 termites and subsocial wood roaches via gene duplication (Bulmer et al., 2012), and may play a  
86 role in termite collective defensive behavior (Esparza-Mora et al., 2020). In contrast, it has also  
87 been hypothesized that sociality could lead to relaxed selection on the individual immune system,  
88 potentially via enhanced behaviourally-mediated protection (e.g. via grooming) and reduced

89 pathogen exposure inside colonies. For example, honey bees are typified by a reduction in  
90 immune gene diversity (Evans et al., 2006), but this immune gene depletion seems to have  
91 preceded the evolution of eusociality in bees (Barribeau et al., 2015), indicating that changes in  
92 underlying immune gene evolution are unrelated to group-level defensive or hygienic adaptations  
93 linked to sociality in this group.

94 Comparative analyses of immune gene evolution across a range of independent social groups  
95 are required in order to begin navigating across these hypotheses. Along with the intensively  
96 studied hymenopteran bee, wasp and ant societies, termites represent an especially important  
97 comparative group in this endeavor due to their ancient and evolutionarily distinct origin of  
98 sociality, as well as the presence of extant representatives of the full spectrum of social  
99 complexity, including some of the most advanced and ecologically successful societies found on  
100 earth (Bignell and Eggleton, 2000). Termites possess a rich array of adaptive social immune traits  
101 (Rosengaus et al., 2010), which serve to effectively prevent the spread of infectious diseases  
102 within colonies (Chouvenc et al., 2012). Genomic analyses of immune gene diversity in a select  
103 number of termites and indicate that they may also possess a full complement of canonical insect  
104 immune gene pathways (Terrapon et al., 2014), but a comprehensive analysis of total immune  
105 gene family evolution across the full spectrum of termite sociality has hitherto been lacking.

106 We exploited a transcriptomic approach to compare the immune gene repertoire of 18 cockroach  
107 and termite species, spanning the full spectrum of solitary and social lifestyles (Fig. 1, Fig. 2),  
108 including two solitary cockroach species, two species of subsocial *Cryptocercus* wood-feeding  
109 cockroaches, which are the closest living relatives of the termites (Inward et al., 2007a), and 14  
110 species of termites selected from a diverse range of evolutionary lineages across the clade.  
111 *Cryptocercus* roaches represent a key lineage in any comparative analysis of termite evolution  
112 because they possess important transitional traits such as subsociality, a wood diet with  
113 associated protist gut symbionts, and developmental similarities with termites (Inward et al.,

114 2007a; Lo and Eggleton, 2010; Nalepa, 2015). The termite species selected include 8 lower  
115 termites representing a range of social modes and ecologies and 6 higher termites belonging to  
116 Termitidae, a group which is thought to have undergone further transitions in symbiotic and social  
117 evolution (Bucek et al., 2019). Following an investigation into immune gene evolution across a  
118 termite phylogeny, we carried out comparative gene expression analyses on representative  
119 species bordering the social transition in order to gain deeper insight into the structure of termite  
120 immunity.

## 121 **Results**

### 122 Contractions and expansions of immune gene families in termites

123 We analyzed immune gene evolution over a well-supported termite phylogeny that we  
124 reconstructed from 152 single copy orthologs (22898 amino acid positions) of 30 cockroach and  
125 termite taxa. Following transcriptome assembly, predicted immune-related genes from 50 gene  
126 families were categorized as either receptors, effectors or signaling molecules. Using a  
127 combination of identification via hmmsearch and trinotate annotations, we found that each gene  
128 family was represented in every cockroach and termite species (Fig. 2), with the noticeable  
129 exception of drosomycin, a family of effectors that we find to be lost in termites and wood roaches.  
130 An average of 293, 248 and 208 immune-related genes were identified in solitary cockroaches,  
131 subsocial wood roaches and social termites, respectively. In a phylogenetic signal analysis, we  
132 detected a strong pattern of total immune gene diversity loss during the evolution of termites  
133 ( $C_{\text{mean}} = 0.449$ ,  $p\text{-value}=0.002$ ; Moran's  $I=0.055$ ,  $p\text{-value}=0.023$ ;  $K=1.391$ ,  $p\text{-value}=0.002$ ;  
134  $K^*=0.869$ ,  $p\text{-value}=0.008$ ;  $\lambda=0.830$ ,  $p\text{-value}=0.008$ ) with significant positive autocorrelation  
135 among species (Fig. S2), particularly among immune gene effector and receptor families (Fig. 2,  
136 Fig. S3). For example, C-type Lectins (CTL), peptidoglycan recognition proteins (PGRPs), and  
137 attacin genes were notably reduced in number in the majority of termites (Fig. 2). As a control for

138 the potential effect of transcriptome incompleteness, we found no evidence of phylogenetic signal  
139 among species for BUSCO scores (Cmean = 0.058, p-value=0.178; Moran's I= -0.059, p-  
140 value=0.467; K=0.371, p-value=0.365; K\*=0.489, p-value=0.286;  $\lambda < 0.0001$ , p-value=1.0). We  
141 then carried out an analysis of gene family evolution by using CAFE to formally test patterns of  
142 gene family contraction and expansion over the termite phylogeny. After testing all structures, we  
143 found that two  $\lambda$  rates, based on clades with a solitary and sub- or social- system, represented  
144 the best fitting model in CAFE (details in Supplementary Text). After applying an error correction,  
145 we found the global evolutionary rate of immune gene families in solitary cockroaches (birth/death  
146 rate[ $\lambda$ ]=0.0037) to be higher than that of subsocial cockroaches and termites ( $\lambda$ =0.0016). Among  
147 effector genes, we found that the thioredoxin peroxidase (TPX) gene family had undergone a  
148 contraction in the Termitidae crown group (family wide p-value: 0.024, node p-value: 0.0013),  
149 while an antimicrobial peptide family, defensin, underwent an expansion in the same group (family  
150 wide p-value: 0.011, node p-value: 0.0257) (Fig. 1, Fig. S3). Aside from these immune genes,  
151 lysozymes (LYS) also experienced expansions in a node within the higher termites (family wide  
152 p-value: 0.02, node p-value: 0.0090). In the receptors, we found that C-type lectins (CTL)  
153 underwent two contraction events during the evolution of termite sociality (family wide p-value:  
154 0.011), once in the most recent common ancestor (MRCA) of subsocial wood roaches + social  
155 termites (node p-value: 0.0173), and once in the MRCA of Rhinotermitidae + Termitidae (node p-  
156 value:0.0021). Interestingly, CTLs appear to have also undergone a re-expansion in higher  
157 termites (node p-value: 0.0278), coinciding with the expansion of lysozymes in this node. We also  
158 detected evidence of GGBP undergoing an expansion in the common ancestor of subsocial  
159 cockroaches (family wide p-value: 0.014, node p-value: 0.0486) and contractions of CLIP (serine  
160 protease) in the MRCA of Rhinotermitidae and Termitidae (family wide p-value: 0, node p-value:  
161 0.0403) and autophagy related genes (ATG) in the MRCA of Termitidae (family wide p-value: 0,  
162 node p-value: 0.0012). Apart from internal nodes shifts, contractions and expansions of gene

163 families were also detected at the tips of termite phylogeny(Fig. S3), including all the gene families  
164 mentioned in internal nodes as well as heme-containing peroxidase (HPX) (family wide p-value:  
165 0.005), superoxide dismutase (SOD) (family wide p-value 0.01), and serpin (family wide p-value:  
166 0.005).

### 167 Weak individual immune response in a termite compared with cockroaches

168 The immune system allows individuals to mount an immune response against microbial infection.  
169 To further investigate the evolution of termite immunity, we compared the individual immune  
170 responses to infection in a solitary cockroach, *Blatta orientalis*, a subsocial wood-feeding roach,  
171 *Cryptocercus meridianus*, and representatives from each caste of the one-piece nesting termite,  
172 *Neotermes castaneus*, following direct injection with a cocktail of heat-killed microbes. In the  
173 solitary cockroach *B. orientalis*, we found 165 and 263 significantly down- and upregulated genes  
174 in immune-challenged individuals respectively (Fig. 3a). Significantly enriched gene ontology  
175 (GO) terms of upregulated genes in *B. orientalis* included Toll and PGRP signaling and  
176 immune/defense processes (Tab. S1). Among total differentially expressed genes, 25 and 10  
177 represented up- and downregulated immune related genes, respectively (Fig. S4). In the  
178 equivalent experiment in the subsocial cockroach *C. meridianus*, we detected a similar pattern to  
179 *B. orientalis*, with 248 and 382 genes being significantly downregulated and upregulated,  
180 respectively (Fig. 3a). Among the total differentially expressed genes, 24 and 19 represented up-  
181 and downregulated immune related genes, respectively (Fig. S4). Overall, solitary and subsocial  
182 roaches are characterized by a significant upregulation of immune genes following immune  
183 challenge, including members of several gene families ranging from receptor, effector and  
184 signaling molecules in both Toll and IMD immune pathways (Fig. 3b, Fig. S4). As in solitary  
185 cockroach, PGRP signaling as well as several immune and defense response categories were  
186 significantly enriched in upregulated genes in *C. meridianus* (Tab. S2).



187 In contrast, a muted response to an equivalent immune challenge was found in termite at the  
188 caste-level, with a reduced number of differentially regulated immune genes as well as non-  
189 immune genes across all castes, particularly in false workers which upregulated only 30 genes in  
190 total in response to treatment (compared with 263 and 382 total upregulated genes in microbe-  
191 treated *B. orientalis* and *C. meridianus* individuals versus control, respectively)  
192 ( $\log_2\text{FoldChange} > 2$ ,  $p < 0.01$ ) (Fig. 3a). Significantly upregulated genes in false workers (N=30)  
193 were not significantly enriched for any GO terms (Tab. S3), while upregulated genes in soldiers  
194 (N=161) were significantly enriched in immune-related and transport as well as metabolic process  
195 GO terms (Fig. 3a, Tab. S4). Upregulated genes in reproductives (N=220) were significantly  
196 enriched in positive regulation of antifungal peptide production and phenol-containing compound  
197 biosynthetic processes (Fig. 3a, Tab. S5). Although total upregulated genes in response to  
198 immune challenge were higher in soldiers and reproductives compared to false workers, the  
199 number of upregulated immune genes was minimal across all castes, with only 9, 11 and 5  
200 immune genes being significantly upregulated in response to immune challenge in *N. castaneus*  
201 reproductives, soldiers and false workers, respectively. One immune gene, a HPX was  
202 upregulated across all castes, but most upregulated immune genes were caste-specific and  
203 functionally non-overlapping, with reproductives and false workers favoring the upregulation of  
204 signaling genes and effector molecules (including an Attacin, a Lysozyme and two HPX genes),  
205 respectively (Fig. 3b, Fig. S5). Interestingly, however, the number of significantly upregulated  
206 unique immune genes in the termite was similar to the number found in solitary and subsocial  
207 roach species, when summed across castes (N= 20, 24, and 25 in *N. castaneus*, *C. meridianus*  
208 and *B. orientalis*, respectively) (Fig. S4, S5). Likewise, the number of significantly upregulated  
209 unique non-immune genes in the termite was similar to the number found in solitary and subsocial  
210 roach species, when summed across castes (N= 313, 358, and 238 in *N. castaneus*, *C.*  
211 *meridianus* and *B. orientalis*, respectively) (Fig. S6). Of the non-immune genes, only 2 significantly  
212 upregulated genes were found to be shared across all three castes. These were a jerky protein

213 homolog-like, and an uncharacterized gene. One gene (poly [ADP-ribose] polymerase 12-like)  
214 was significantly upregulated in both false workers and reproductives, while 7 genes were  
215 upregulated in both false workers and soldiers and 84 upregulated genes were upregulated in  
216 both soldiers and reproductives.

## 217 Caste-specific immunity in the termite *N. castaneus*

218 We next compared total gene expression differences between castes in the absence of direct  
219 immune challenge to understand how caste identity itself shapes constitutive immunity at the  
220 individual level. We found that reproductives displayed the highest levels of constitutive immune  
221 gene expression, followed by false workers, which can reproduce later in development depending  
222 on colony requirements, and then soldiers, which are a permanently sterile terminal caste (Fig.  
223 S7). We found that expression of immune related genes could be effectively categorized by caste  
224 in a principle component analysis (Fig. 4c). Significantly highly expressed immune genes in  
225 reproductives included signaling genes such as Spaetzle, as well as effector molecules Termicin  
226 and two Lysozyme genes, while expression of a third Lysozyme, an MD2-like receptor and  
227 oxidases were significantly enhanced in false workers. One PGRP gene was significantly highly  
228 expressed in soldiers (Fig. 4d). With respect to differentially expressed genes in general,  
229 significantly enriched GO terms of highly expressed genes in the reproductive caste included  
230 several reproductive and developmental processes as well as pheromone synthesis (Tab. S6),  
231 while carboxylic acid biosynthesis was significantly enriched in highly expressed genes of false  
232 workers (Tab. S7). No GO terms were significantly enriched in highly expressed genes of soldiers  
233 (Tab. S8).

## 234 Comparison of termite and cockroach gene expression changes in response to a social 235 immune challenge

236 Recent data indicate that social insect colonies can dynamically adjust interactions in response  
237 to infection (Davis et al., 2018; Pull et al., 2018), and segregate between the source of disease  
238 and valuable individuals, such as reproductives (Cremer et al., 2018; Naug and Camazine, 2002;  
239 Stroeymeyt et al., 2018), in order to keep group fitness. To explore this concept at a molecular  
240 level, we quantified gene expression changes in each caste of *N. castaneus* following colony  
241 exposure to immune-challenged nestmates (Fig. 4a), and compared these with gene expression  
242 changes in the gregarious cockroach, *B. orientalis* following group exposure to immune-  
243 challenged conspecifics. The immune challenged individuals of both species was injected with a  
244 cocktail of heat-killed microbes, allowing us to exclude the pathogen itself as a cue for social  
245 behavior and focus exclusively on the effect of individual health status on social response (Hernández  
246 López et al., 2017). This enabled us to explore how social caste structure influences the response to a  
247 social immune threat. In *N. castaneus* we identified a caste-specific response to social immune  
248 challenge, with the following number of differentially regulated genes in each caste (upregulated,  
249 downregulated): reproductives (1,1), soldiers (1,0), false workers (12,96). Significantly  
250 upregulated genes in false workers were related to metabolic functions and chemoreception,  
251 including a fatty acid synthase, a trypsin-like protein and a gustatory and odorant receptor.  
252 Downregulated genes included transport-related, oxidation-related and protease related genes  
253 (Tab. S9). In the equivalent experiment carried out in *B. orientalis*, we found a smaller number of  
254 genes to be significantly upregulated (N=9) and downregulated (N=7) following exposure to  
255 immune-challenged conspecifics. Upregulated genes in conspecifics included 2 serine proteases,  
256 a trypsin-4, an ankyrin repeat and fibronectin type-III domain-containing protein 1 as well as 5  
257 other uncharacterized genes. Downregulated genes contained a hemolymph lipopolysaccharide-  
258 binding protein, a troponin T, a protein obstructor-E and 4 other uncharacterized genes.  
259 Upregulated genes were enriched for GO terms linked to serine peptidase and hydrolase activity  
260 (Fig S8, Tab. S10), although the role of these genes in cockroach immunity remains unclear.

## 261 Discussion

262 The relationship between the evolution of complexity and immunity is attracting attention as  
263 researchers increasingly appreciate the interdependency between biological individuality and  
264 immunity (Pradeu, 2011, 2019). The evolution of the most advanced forms of eusociality entailed  
265 the emergence of a novel form of biological individual – the “superorganism” (Boomsma and  
266 Gawne, 2018) – that just as with the evolution of multicellularity, required the obligate loss of  
267 independence of previously replicating entities (Fisher et al., 2013; Michod and Herron, 2006).  
268 While our understanding of the evolution of individual immunity has increased considerably in  
269 recent years, knowledge about the evolution of immunity in social insects has lagged behind (Pull  
270 and McMahon, 2020).

271 We addressed this gap in knowledge in termites by firstly developing a conservative prediction  
272 procedure to investigate immune gene family evolution during the transitions through wood roach  
273 subsociality to termite sociality. We detected a full repertoire of immune gene families in all  
274 *Cryptocercus* and termite lineages except for the antimicrobial peptide drosomycin. Furthermore,  
275 we found that early branching termites underwent significant contractions of a few immune gene  
276 families followed by minor re-expansions in selected wood roach and termite lineages.

277 Our reconstruction of immune gene family evolution over a termite phylogeny revealed the loss  
278 of drosomycin in the ancestor of *Cryptocercus* wood roaches and termites. Drosomycin was first  
279 identified in *Dorsophila* as an antifungal peptide (Zhang and Zhu, 2009). It is unclear whether this  
280 loss is caused by ecological shifts or the appearance of social system, or both. But it is possible  
281 that the pleiotropic function of newly evolved fungicidal molecules, like GGBP2 (Bulmer et al.,  
282 2012), which acts synergistically with the AMP termicin (Velenovsky et al., 2016) may have led to  
283 functional redundancy and subsequent loss of drosomycin. Alongside evidence of expanded  
284 antioxidant genes in cockroaches (Harrison et al., 2018), our observation of contracted TPX ( a

285 type of peroxidase known as peroxiredoxins (Radyuk et al., 2001)) in the MCRA of higher termites  
286 suggested an important link between antioxidant processing and termite evolution. In addition, we  
287 found that CTL, comprising a large proportion of hemolymph lipopolysaccharide-binding proteins  
288 (LPSBP) underwent two significant contractions in the MRCA of *Cryptocercus* and termites as  
289 well as in the MRCA of Rhinotermitidae and Termitidae. CTLs play an important role in insect  
290 innate immunity and can impact infection outcomes for a range of infectious pathogens as well  
291 as regulating host microbiota (Zhu et al., 2020). LPSBPs are significantly expanded in  
292 cockroaches (Harrison et al., 2018) and are thought to function as opsonins, by binding the surface  
293 molecules of invading microorganisms (Jomori et al., 1990; Jomori and Natori, 1991; Jomori and  
294 Natori, 1992). A CTL from the hemolymph of *P. americana* has been shown to possess  
295 phenoloxidase activity (Arumugam et al., 2017; Chen et al., 1995). Furthermore, LPSBPs may  
296 play a possible function in trapping *Blattabacterium* sp. endosymbionts that have leaked from the  
297 fat body into the hemolymph, in addition to functioning in the normal cockroach defence  
298 mechanism against foreign microbes (Jomori et al., 1990; Kambhampati et al., 1996). The loss of  
299 *Blattabacterium* in the ancestor of Euisoptera (all termites excluding Mastotermitidae) may  
300 partially explain the pattern of CTL gene depletion, although the significantly reduced diversity of  
301 this gene family in both *Cryptocercus* and *M. darwiniensis* indicates that other factors may also  
302 be at play. In bees, immune gene depletion seems to have preceded the evolution of  
303 eusociality (Barribeau et al., 2015), indicating that immune gene family evolution in Hymenoptera  
304 is unrelated to evolutionary transitions in sociality. Although the pattern of immune gene diversity  
305 loss in early branching termites appears to contrast with this finding, the significant expansions of  
306 genes, including immune genes, in cockroaches compared to other non-social insects (Harrison  
307 et al., 2018; Li et al., 2018) could be interpreted as a relative enhancement of immune gene  
308 diversity in the ancestral cockroach clade followed by a return to a more representative level of  
309 gene diversity in termites.

310 Aside from a general pattern of immune gene diversity loss in termites, we were able to detect  
311 some evidence of gene family re-expansion in some higher termite lineages, potentially resulting  
312 from extreme diet diversification and/or shifts in nesting ecology (Donovan et al., 2000). The  
313 microbe-enriched lifestyles of which could impose significant selective pressures on immune gene  
314 evolution. Equally, modifications to social structure and caste development, or the loss of obligate  
315 protist symbionts in the gut could also be major drivers of immune gene evolution in higher  
316 termites. However, the extent to each of these large-scale changes in immune family diversity  
317 associated with underlying shifts in termite feeding and nesting ecology, microbial symbiosis or  
318 sociality requires a more thorough examination in future.

319 The contractions of immune gene families during termite evolution may reflect a general  
320 weakening of individual immunity and/or a specialization of immune responses. We detected  
321 similar individual responses to direct immune challenge in the subsocial cockroach *C. meridianus*  
322 and the solitary cockroach *B. orientalis*. This suggests that the initial emergence of subsociality  
323 was not associated with significant changes to induced immunity. In contrast, a muted individual  
324 immune response across all termite castes indicates that the evolution of termite sociality is  
325 correlated with a reduced ability to mount a robust immune response. A similar phenomenon has  
326 been identified in other social insects including bees and wasps where eusocial insect groups  
327 show weaker melanization responses than their close solitary relatives (López-Urbe et al., 2016).  
328 This could potentially be the result of trade-offs in selection on individual versus social immunity  
329 in more advanced social groups (Cotter and Kilner, 2010).

330 The social insect colony is a highly organization society with specialized castes. Previous studies  
331 in termites have revealed caste specific expression patterns that reflect the specialized functions  
332 of castes within colony (Husseneder and Simms, 2014; Jones et al., 2017; Mitaka et al., 2017;  
333 Mitaka et al., 2016; Scharf et al., 2003). In this study, we show that constitutive immune gene  
334 expression is strongly caste specific in *N. castaneus*, reflecting a division of social roles and

335 indicating a significant degree of caste-specific immune defense. For example, constitutive  
336 immune gene expression levels were highest overall in reproductives and lowest in soldiers. A  
337 similar finding has been reported in comparisons of workers versus reproductives in bees  
338 (Grozinger et al., 2007) and ants ((Graeff et al., 2007), although see (Quque et al., 2019)). Due  
339 to the limited number of tested termite species in this study, it is difficult to make generalized  
340 statements about common immune gene expression patterns across all termite clades.  
341 Nonetheless, our observations clearly reveal a correlation between the evolution of sociality and  
342 caste-related immune investment patterns in termites.

343 Social context plays an important role in coordinating collective behavior in social insects. It has  
344 been demonstrated that caste formation can impact immune gene expression in termites (Gao  
345 and Thompson, 2015; He et al., 2018). Alongside caste-specific immune gene expression  
346 patterns, individuals from different castes may respond to social cues differently, potentially  
347 reflecting different levels of investment in individual versus social immunity. Social cues may  
348 comprise unique chemical signatures such as cuticle hydrocarbons, which have been shown to  
349 be produced by infected worker bees and can evoke an immune response in queens (Hernández  
350 López et al., 2017). To investigate this question in termites, we carried out a simplified social  
351 challenge experiment whereby the gene expression responses of representatives from each  
352 caste of *N. castaneus* were recorded following exposure to immune-challenged false-worker  
353 nestmates. For comparison, the equivalent experiment was conducted in a cockroach. Due to the  
354 limited material available for the rare subsocial wood roach *Cryptocercus*, we limited our  
355 comparisons to *N. castaneus* and the solitary cockroach *B. orientalis*. Interestingly, *B. orientalis*  
356 cockroaches exposed to immune-challenged conspecifics had a limited number of differentially  
357 regulated genes and no differentially regulated immune- or communication-related genes could  
358 be identified. In contrast, termite false workers showed a high number of differentially regulated  
359 expressed genes, including upregulated genes in metabolic function- and chemoreception-related

360 activities. Compared with the solitary cockroach, *N. castaneus* appears to be able raise a  
361 coordinated caste-specific social immune response, despite it being a single-piece nesting termite  
362 species with an intermediate level of social complexity among termites (Inward et al., 2007b). We  
363 recorded a negligible impact of social challenge on soldiers and reproductives gene expression  
364 indicating that only false workers actively respond to immune-challenged false-worker nestmates,  
365 and that they do so by modulating putative sensory and metabolic pathways rather than immune  
366 processes. Differentially expressed chemoreception genes in false workers indicate a possible  
367 role for chemical communication in coordinating collective social immune responses in *N.*  
368 *castaneus*. However, the importance of behavioural or acoustic cues in termites should be  
369 considered as further sources of information in the co-ordination and origins of termite collective  
370 defense (Rosengaus et al., 1999). Further work comparing the responses of castes to immune-  
371 challenged soldiers and reproductives, in addition to widening study to a greater diversity of  
372 termite species, will help to resolve whether the patterns we have observed represent a universal  
373 termite response mechanism to social disease challenge.

374 Using termites as a case study, we have shown that early branching termites underwent  
375 significant contractions of major immune gene families followed by minor re-expansions in  
376 selected termite lineages. In a cross-species comparison of gene expression, our results reveal  
377 a close similarity in induced molecular immunity between solitary and subsocial roach species,  
378 despite key ecological, developmental, symbiotic and genomic traits shared by *Cryptocercus* +  
379 Termitoidae (Koshikawa et al., 2008; Lo and Eggleton, 2010; Nalepa, 2015; Ohkuma et al., 2008).  
380 In comparison with the roach outgroups, we found that termites displayed a dampened response  
381 to direct immune challenge at the caste-level. Yet this effect faded when responses were pooled  
382 across castes. We find that termites have evolved caste-specific defenses to social as well as  
383 individual immune-challenge, reflecting a potential change in focus away from individual defense  
384 towards group-level protection and fitness.



385 Our study shows that the transition to termite eusociality was linked to a significant reconfiguration  
386 of termite immune gene diversity and regulation, revealing how a major transition in evolutionary  
387 complexity likely entailed fundamental modifications to immune system organization. This study  
388 not only provides new insights into the evolution of eusociality in social animals but also facilitate  
389 our understanding of the emergence of biological complexity during a major evolutionary  
390 transition.

## 391 **Methods**

### 392 **Insects and microorganisms**

393 Larvae and different castes of 9 termite species were extracted from colonies that were kept in  
394 the Federal Institute of Materials Research and Testing (BAM), Berlin, Germany. The termite  
395 colonies were fed regularly with pre-decayed birch wood or dry grass. An additional 6 species of  
396 higher termites were collected from China and Cameroon. Two subsocial wood roaches, *C.*  
397 *meridianus* and *C. pudacuoensis* were collected from Yunnan, China. The solitary cockroaches,  
398 *B. orientalis* and *Blattella germanica*, were kept at 26 °C and 75% relative humidity, and were fed  
399 with mixed dog food, apples and carrots *ad libitum* until used in experiments. The details of  
400 experimental insects are listed in Supplementary Table S11. A Gram-negative bacterium  
401 (*Pseudomonas entomophila*, DSM 28517<sup>T</sup>), a Gram-positive bacterium (*Bacillus thuringiensis*,  
402 DSM 2046<sup>T</sup>) and a yeast (*Saccharomyces cerevisiae*, DSM 1333<sup>T</sup>) were stored in BAM and  
403 cultivated for use in subsequent immune challenge experiments.

### 404 **Sample collection and immune challenge experiments**

#### 405 Microorganism preparation

406 *P. entomophila* and *B. thuringiensis* were grown at 28 °C and 30 °C in nutrient broth, respectively.  
407 *S. cerevisiae* were grown at 25 °C in universal yeast medium. A growth curve was made for each  
408 microorganism. All microorganisms were freshly cultivated, collected during exponential phase,  
409 washed twice with Ringer's solution, and mixed in equal amounts to form a cocktail with a final

410 concentration of  $5 \times 10^8$  CFU/ml. The suspension of microorganisms was then heat-killed at 95  
411 °C for 10 minutes for subsequent use in experiments.

#### 412 Samples for immune gene characterization

413 We generated standardized *de novo* transcriptomes for the identification of immune genes from  
414 19 cockroach and termite species, and subsequent comparative analyses of immune gene  
415 evolution over the termite phylogeny. Aside from the wood roaches, all insects were prepared for  
416 *de novo* sequencing by snap-freezing freshly collected animals in liquid nitrogen. For the wood  
417 roaches, colonies collected in the field were preserved in RNAlater following controlled immune  
418 challenge. To enrich the expression of immune genes, cockroach adults were challenged by  
419 injecting with  $5 \times 10^6$  cells of heat-killed microorganisms per gram of weight after being swabbed  
420 with ethanol. Cockroach larvae and termites were challenged by piercing the cuticle with a sterile  
421 needle that had been dipped in a heat-killed microbial suspension, prepared as described above.  
422 The wood roaches were frozen in liquid nitrogen or immersed in RNAlater 24 hours after being  
423 challenged. All collected samples were preserved at -70 °C until RNA extraction. Termites from  
424 the same caste and treatment (non-challenged or challenged) were mixed together for RNA  
425 extraction. Cockroaches were extracted individually except larvae (non-challenged or challenged)  
426 which were mixed for RNA extraction. Equal amounts of total RNA from extractions were pooled  
427 by species for subsequent library construction.

#### 428 Individual immune challenge experiment

429 In the first gene expression experiment, responses to a direct immune challenge were compared  
430 between the solitary oriental cockroach, *B. orientalis*, the subsocial wood roach, *C. meridianus*  
431 and three castes of *N. castaneus* (false workers, soldiers, and reproductive). The termite, *N.*  
432 *castaneus*, is a basal “one-piece” termite (in which a piece of wood serves as both food and nest)  
433 and has an intermediate form of social complexity. It possesses a sterile soldier caste, a  
434 reproductive caste and so-called false workers, which carry out shared tasks such as proctodeal

435 trophallaxis and allogrooming (Davis et al., 2018; De Bie et al., 2006), while retaining the  
436 physiological capacity to develop into reproductive individuals under the right colony conditions  
437 (Korb and Hartfelder, 2008). The subsocial wood feeding, *C. meridianus*, which represents the key lineage  
438 of *Cryptocercus* that is important in any comparative analysis of termite evolution because of  
439 important transitional traits such as subsociality, a wood diet with associated protist gut symbionts,  
440 and developmental similarities with termites (Inward et al., 2007a; Lo and Eggleton, 2010; Nalepa,  
441 2015). The cockroach, *B. orientalis*, is reproductively solitary but behaviourally gregarious. As  
442 such, *B. orientalis* represented an appropriate comparative control by possessing inherently social  
443 behavior while lacking true eusociality. Individuals (N=16 from one cohort of *B. orientalis*, N=16  
444 from 8 colonies of *C. meridianus*, N=32 of each caste from 16 colonies for *N. castaneus*) were  
445 weighed and were injected with  $5 \times 10^6$  cells of heat-killed microbial cocktail per gram of whole  
446 body (N=8 cockroaches; N=16 termites of each caste) or an equivalent volume of Ringer's  
447 solution (N=8 cockroaches; N=16 termites of each caste). Following injection, individuals were  
448 kept individually with a piece of filter paper. Termites and *B. orientalis* cockroaches were frozen  
449 in liquid nitrogen 24 hours following injection, while wood roaches were immersed in RNAlater  
450 and stored at -20 °C until transportation. All samples were preserved at -70 °C until RNA  
451 extraction.

452 For sequencing, equal amounts of total RNA from 8 and 4 injected individuals were pooled for  
453 termites and cockroaches for each treatment for library preparation, respectively. Each caste,  
454 species and treatment were represented by 2 libraries (N= 12, 4 and 4 total libraries for *N.*  
455 *castaneus*, *C. meridianus* and *B. orientalis*, respectively).

#### 456 Social immune challenge experiment

457 In the second gene expression experiment, the transcriptional responses of conspecifics of the  
458 oriental cockroach *B. orientalis*, and nestmates of the termite, *N. castaneus* were quantified and  
459 compared, following social exposure to related individuals challenged with heat-killed

460 microorganisms or an equivalent Ringer's solution. To enable accurate comparison, we  
461 maintained cockroach groups (N=12 groups, each group hatched from a different ootheca) or  
462 termite mini-colonies (N=12 mini-colonies, each mini-colony derived from a different mature  
463 colony) under equivalent conditions. Groups were comprised of 8 adult cockroaches or 8 termites  
464 (4 false workers, 2 soldiers and 2 reproductives derived from the same mature colony) housed  
465 inside plastic containers adjusted to maintain a similar volume to insect body surface area ratio  
466 across species. *N. castaneus* mini-colonies were housed inside boxes containing a piece of wood  
467 which was transferred from the original colony from which the termites were also sourced. An  
468 equivalently sized shelter was constructed from egg-box carton and placed inside the containers  
469 housing the cockroach mini-groups. All termite mini-colonies were allowed to adjust to their new  
470 setting condition over a period of 2 weeks and were inspected regularly. Only those found to  
471 contain freshly laid eggs were used in the experiment. For the experiment, two false workers from  
472 each of the 12 termite mini-colonies and two cockroaches from each of the 12 mini-groups were  
473 randomly selected and weighed for immune challenge, before being swabbed with ethanol. Half  
474 of the focal pairs were injected with  $5 \times 10^6$  heat-killed microbes per gram of whole body (N=6  
475 groups/mini-colonies) while the remaining half were injected with an equivalent Ringer's solution  
476 (N=6 groups/mini-colonies). After injection, focal individuals were individually marked with dark-  
477 green dye and returned to the group or colony of origin. Every non-marked individual from the  
478 termite mini-colonies, or two randomly selected non-marked cockroaches from each group, were  
479 frozen in liquid nitrogen 24 hours following the introduction of injected individuals and stored at -  
480 70 °C until RNA extraction.

481 For sequencing, equal amounts of total RNA from 4 individuals of each caste, treatment and  
482 species from 2 mini-colonies or mini-groups were pooled for library preparation. Each caste,  
483 treatment and species had 3 libraries (N=18 and 6 pooled libraries for *N. castaneus* and *B.*  
484 *orientalis*, respectively). For the analysis of gene expression differences between *N. castaneus*

485 castes (Results section: “Caste-specific immunity in the termite *N. castaneus*”), gene expression  
486 data from libraries derived from both social immune treatments were combined prior to analysis  
487 (N=6 replicates per caste).

#### 488 Total RNA extraction and transcriptome sequencing

489 For immune gene characterization, total RNA was extracted as described above. For the first and  
490 second gene expression experiments, total RNA was isolated from individuals for all species. Due  
491 to the large body size, adult cockroaches were cut into 4-6 parts for separate extraction, followed  
492 by re-pooling. For the extraction itself, samples were suspended in pre-cooled Trizol (Thermo  
493 Fisher Scientific) and homogenized twice at 10 s at 2 M/s with a 5-mm steel bead (Qiagen) using  
494 a tissue homogenizer (MP Biomedicals). Total RNA was isolated with a chloroform extraction,  
495 followed by isopropanol precipitation, according to instructions from Trizol. Extracted total RNA  
496 was dissolved in RNA storage solution (Ambion) and then incubated with 2 units of TurboDNase  
497 (Ambion) for 30 min at 37 °C, followed by purification with an RNAeasy Mini kit (Qiagen) according  
498 to manufacturer's instructions. Quantity and quality of RNA were determined by Qubit and  
499 Bioanalyzer 2100, respectively. Following pooling described in sample collection part, total RNA  
500 was used to construct barcoded cDNA libraries using a NEXTflex™ Rapid Directional mRNA-seq  
501 kit (Bioo Scientific). Briefly, mRNA was enriched using poly-A beads from total RNA and  
502 subsequently fragmented. First and second-strand cDNA was synthesized and barcoded with  
503 NEXTflex™ RNA-seq Barcode Adapters. The libraries were sequenced on an Illumina  
504 NextSeq500/550 platform at Berlin Center for Genomics in Biodiversity Research (BeGenDiv).

#### 505 **Phylogenetic analysis**

506 In addition to sequence datasets from this study, we used another 10 publicly available  
507 transcriptomic datasets of cockroaches and termite for phylogenetic inference (Supplementary  
508 Table S12). The raw reads were cleaned and filtered before assembled by Trinity (version v2.5.1)  
509 (Grabherr et al., 2011) with default parameters (Kmer length: 25). Subsequently, the assemblies

510 were filtered and cleaned before translated into proteins by Transdecoder (version 5.0.1) with a  
511 minimum length of 60 amino acids. Raw 454 sequence reads were assembled by using Newbler  
512 v2.7 (454 Life Sciences/ Roche). The translated protein sets and an official gene set of  
513 *Macrotermes natalensis* (<http://gigadb.org/dataset/100057>) were used for ortholog analysis by  
514 OrthoFinder (version v2.0.0) (Emms and Kelly, 2015). We selected 152 ortholog groups and  
515 aligned each group with MAFFT(Katoh and Standley, 2013), masked alignments with trimAl  
516 v1.2(Capella-Gutiérrez et al., 2009), and concatenated with Phyutility(Smith and Dunn, 2008) to  
517 build a matrix. We employed two different approaches to constructing the phylogeny: maximum  
518 likelihood with RAxML (v8.2.12) (Stamatakis, 2014) and Bayesian inference with ExaBayes  
519 (v1.4.1) (Aberer et al., 2014). To estimate the divergence times for termites, a molecular clock  
520 analysis was performed with PhyloBayes (v4.1) (Lartillot and Philippe, 2004) with following age  
521 constraints: all cockroaches and Isoptera: 145.5-315.2 mya (representing the age of the  
522 root)(Vršanský, 2002), Cryptocercus and Isoptera: 130-235 mya (Krishna et al., 2013),  
523 Kalotermitidae and Rhinotermitidae plus Termitidae: 94.3-235 mya(Krishna and Grimaldi, 2003),  
524 Termitidae and Coptotermes plus Reticulitermes: 47.8-94.3 mya (Engel et al., 2011),  
525 Reticulitermes and Coptotermes: 33.9-94.3 mya (Engel et al., 2007). Further details in phylogeny  
526 reference and molecular dating are available in Supplementary text.

527

## 528 **Immune related protein identification and evolutionary analysis**

### 529 Assembly annotation

530 For annotation, the full raw reads from 19 species sequenced for immune gene characterization  
531 were assembled with Trinity using default parameters. Assembly completeness was assessed by  
532 Benchmarking Universal Single-Copy Orthologs (BUSCO v2) with the Arthropod BUSCO set from  
533 orthoDB (version 9) (Simão et al., 2015). Each assembly (except *Pericapritermes* sp., due to low  
534 completeness, Table S13) was queried against the NCBI nr database by using DIAMOND  
535 (Buchfink et al., 2015) and the taxonomic classification of each query assembly was performed

536 using the Lowest Common Ancestor algorithm. The assemblies were annotated by following the  
537 guidelines of Trinotate (<https://trinotate.github.io/>). The proteins of each assembly were predicted  
538 by using TransDecoder (v5.2.0) (<http://transdecoder.github.io>) with a minimum length of 60 amino  
539 acids. Homology searches, predictions and domain identifications were performed locally and  
540 subsequently integrated into SQLite database at an e-value threshold of 1e-03.

#### 541 *Immune gene identification*

542 We adopted a conservative approach to identifying immune gene targets from our transcriptomes.  
543 This strategy exploits the cluster information provided by Trinity, which is then used to curate the  
544 identification of immune genes. The process we developed first uses HMMER to identify proteins  
545 using a domain-based search strategy. Following filtering, HMMER searches are complemented  
546 with a blast approach within the trinotate suites, and the application of further quality control steps.  
547 The steps are described in detail below.

548 The first step entailed the modification of a previously published method (Sackton et al., 2017) to  
549 quantify the presence of domains containing putative immune functions. Specifically, immune  
550 gene families from 31 species in the orthoDB database as well as Termicin and Transferrins from  
551 Uniprot (insects) were downloaded and used to construct a set of HMM profile-curated alignments  
552 based on all protein families. The complete set of predicted proteins (> 60 amino acids in length)  
553 from transcriptomes were searched for matches against predicted immune-related HMMs using  
554 HMMER 3.1(<http://hmmer.org/>). Following domain identification, the HMMER output was  
555 subjected to stringent filtering to exclude misidentified transcripts: 1) All targets with E-values >  
556 0.001 for the best domain were excluded. 2) Targets with overall E-value greater than 10<sup>-5</sup> were  
557 disregarded. 3) Targets with multiple HMMs were assigned only to the best e-value HMM.  
558 Following these filtering steps, predicted proteins were queried using blastp against the immune  
559 gene family database. Proteins were only considered for further analysis when they were  
560 assigned to the same immune family as the HMM search. Thirdly, as most genes have multiple

561 immune predicted proteins derived from different isoforms, only one representative isoform (that  
562 encoded the protein with the highest overall E-value HMM among all the other proteins from that  
563 gene) was chosen for each gene based on the trinity output header. This process excluded  
564 multiple isoforms of the same gene and reduced the redundancy of each assembly.

565 The filtered HMMER outputs were then further selected using annotations from trinotate. Putative  
566 gene targets were selected when the output of their predicted proteins from the constructed  
567 database matched their annotations of blastp in trinotate. Subsequently, targets were removed  
568 when their predicted proteins were shorter than 100 amino acids in immune gene families, except  
569 antimicrobial peptides.

570 We applied an additional layer of filtering to separate isoforms from paralogues and potential gene  
571 fragments based on the headers of trinity assembly output. Firstly, because it is theoretically  
572 possible that different components from the same subcluster represent spliced isoforms of a  
573 single gene, we aligned nucleotide sequences and corresponding predicted proteins from each  
574 subcluster against one other using MAFFT and excluded sequences that were variable in length  
575 but otherwise identical. Secondly, to account for different fragments of the same gene potentially  
576 appearing in different subclusters of a single cluster (and being erroneously described as two  
577 separate genes), we ran an additional blastx search on all putative subcluster sequences. If more  
578 than one subcluster had an identical target in the top 10 entries of a DIAMOND blastx search (and  
579 overlapped by less than 9 amino acids – a value determined by the use of a 25 k-mer parameter  
580 during transcriptome assembly), only the longest subcluster was retained (this applied to 13 of  
581 404 putative immune gene sequences). These additional measures enabled us to accurately  
582 differentiate between spliced isoforms or fragmented gene sequences and true paralogs.

583 Before using our immune gene predictions in downstream analyses, we confirmed the reliability  
584 of our method by subjecting our pipeline to the completed genomes of *B. germanica* and



585 *Zootermopsis nevadensis*. We applied the procedures described above, aside from the isoform  
586 filtering steps, to the official gene sets of *B. germanica* and *Z. nevadensis* to verify that the immune  
587 genes identified from our RNAseq data corresponded to data originating from completed  
588 genomes. We found that the numbers of estimated immune genes from transcriptome and  
589 genome-derived datasets were consistent with each other in both *B. germanica* and *Z.*  
590 *nevadensis*, with minor variations in a limited number of gene families being detected (Fig. 2).

### 591 Evolutionary analysis of immune gene families

592 We tested the patterns of immune gene evolution over our termite phylogeny using  
593 phyloSignal(Keck et al., 2016), which is designed to detect the presence of phylogenetic signal in  
594 continuous traits among species. We employed the time-calibrated phylogeny derived from the  
595 above phylogenetic analysis and tested the phylogenetic signal of two trait values associated with  
596 each tip (species): i) total predicted immune genes derived from each assembly and, ii) associated  
597 BUSCO scores as a control for the effect of transcriptome assembly quality.

598 The expansion and contraction of immune gene families (Fig. S3) was predicted using CAFE 4.0  
599 (-p 0.05)(De Bie et al., 2006), which is based on gene family size and a dated phylogenetic tree.

600 The official gene set of *Z. nevadensis* (Terrapon et al., 2014) and the transcriptome-derived  
601 assembly of *Z. nevadensis* were used to estimate the distribution of differences (esterror  
602 command in CAFE, -diff 9, determined by the largest difference of gene family sizes between  
603 transcriptomes and genomes in *Z. nevadensis* and *B. germanica*) between genome- and  
604 transcriptome-derived data, in order to account for any potential bias introduced from the *de novo*  
605 transcriptomic approach. Subsequently, the estimated error difference was applied to all species  
606 in the dataset. As CAFE allows the application of different death/birth rates at different nodes in  
607 the phylogeny (using “lambda -t”), we chose to test different rate structures in order to establish  
608 the most suitable model. In addition to the potential structures based on clades with different  
609 levels of sociality (solitary, subsocial, social) we tested 16 other structure-based node-clustering

610 methods, as previously described (Kapheim et al., 2015). The node-clustering method firstly  
611 calculated independent maximum likelihood lambda values for each node by setting the rate of  
612 the focal node differently to the remaining background nodes, and clustered the rates with kmeans  
613 clustering. In total 25 structures (M1-M25, Supplementary text) were tested and each structure  
614 was repeated 5 times to check for convergence. After testing all structures, we found that the  
615 model containing two  $\lambda$  rates, based on clades with a solitary and sub- or social system, was the  
616 best fitting model. The significance of the chosen model was then determined by genfamily and  
617 lhtest commands in CAFE. The birth and death rate (lambda) of the chosen model was estimated,  
618 and the gene families with family-wide p-values < 0.05 were reported.

619

## 620 **Differential gene expression analysis**

621 The raw datasets for the social and individual immune challenge experiments were assembled  
622 together and annotated according to the procedures as applied in the phylogenetic analysis  
623 section above. Transcript expression following immune challenge in both experiments was  
624 quantified by using salmon (Patro et al., 2017). We applied a taxonomy classification with the LCA  
625 algorithm in DIAMOND to identify non-target sequences, after which the transcripts with queried  
626 targets from Metazoan were considered as host genes and used for further analysis. Differential  
627 gene expression was analysed using the R package DESeq2 (Love et al., 2014) using the contrast  
628 argument to extract comparisons of interest from DESeq models where all groups from a given  
629 experiment are run together (e.g. treatments or castes). In the comparison of gene expression  
630 between termite castes as well as in the individual immune challenge experiment we considered  
631 genes to be significantly differentially expressed when fold changes > 4 and adjusted p-values <  
632 0.01. Because the responses of nestmates in the social immune challenge experiment were  
633 potentially subtle, we considered genes to be significantly differentially expressed when fold  
634 changes > 2 and adjusted p-values < 0.05. Significantly differentially expressed genes were

635 subject to Gene Ontology (GO) enrichment analysis by the R package goseq with an adjusted p-  
636 value cut-off of 0.05. The GOs were extracted from the Trinotate annotation. After GO enrichment  
637 analysis, the redundancy of enriched GOs was reduced by using REVIGO (Supek et al., 2011).  
638 We calculated the number of differentially expressed genes for each immune protein family to  
639 compare immune responses across termite castes (*N. castaneus*) and species (*B. orientalis*, *C.*  
640 *meridianus*, *N. castaneus*).

641

## 642 **References**

- 643  
644 Aberer, A.J., Kobert, K., Stamatakis, A., 2014. ExaBayes: massively parallel Bayesian tree inference for  
645 the whole-genome era. *Mol Biol Evol* 31, 2553-2556.
- 646 Arumugam, G., Sreeramulu, B., Paulchamy, R., Thangavel, S., Sundaram, J., 2017. Purification and  
647 functional characterization of lectin with phenoloxidase activity from the hemolymph of cockroach,  
648 *Periplaneta americana*. *Arch Insect Biochem Physiol* 95, e21390.
- 649 Barribeau, S.M., Sadd, B.M., du Plessis, L., Brown, M.J., Buechel, S.D., Cappelle, K., Carolan, J.C.,  
650 Christiaens, O., Colgan, T.J., Erler, S., 2015. A depauperate immune repertoire precedes evolution of  
651 sociality in bees. *Genome Biol* 16, 83.
- 652 Bignell, D.E., Eggleton, P., 2000. Termites in ecosystems, *Termites: evolution, sociality, symbioses,*  
653 *ecology.* Springer, pp. 363-387.
- 654 Boomsma, J.J., Gawne, R., 2018. Superorganismality and caste differentiation as points of no return:  
655 how the major evolutionary transitions were lost in translation. *Biol Rev* 93, 28-54.
- 656 Bucek, A., Šobotník, J., He, S., Shi, M., McMahon, D.P., Holmes, E.C., Roisin, Y., Lo, N., Bourguignon, T.,  
657 2019. Evolution of termite symbiosis informed by transcriptome-based phylogenies. *Curr Biol*.
- 658 Buchfink, B., Xie, C., Huson, D.H., 2015. Fast and sensitive protein alignment using DIAMOND. *Nat*  
659 *Methods* 12, 59.
- 660 Bulmer, M., Denier, D., Velenovsky, J., Hamilton, C., 2012. A common antifungal defense strategy in  
661 *Cryptocercus woodroaches* and termites. *Insectes Soc* 59, 469-478.
- 662 Bulmer, M.S., Crozier, R.H., 2004. Duplication and diversifying selection among termite antifungal  
663 peptides. *Mol Biol Evol* 21, 2256-2264.
- 664 Capella-Gutiérrez, S., Silla-Martínez, J.M., Gabaldón, T., 2009. trimAl: a tool for automated alignment  
665 trimming in large-scale phylogenetic analyses. *Bioinformatics* 25, 1972-1973.
- 666 Chen, C., Durrant, H., Newton, R., Ratcliffe, N., 1995. A study of novel lectins and their involvement in  
667 the activation of the prophenoloxidase system in *Blaberus discoidalis*. *Biochem J* 310, 23-31.
- 668 Chouvenc, T., Robert, A., Semon, E., Bordereau, C., 2012. Burial behaviour by dealates of the termite  
669 *Pseudacanthotermes spiniger* (Termitidae, Macrotermitinae) induced by chemical signals from termite  
670 corpses. *Insectes Soc* 59, 119-125.
- 671 Cotter, S., Kilner, R., 2010. Personal immunity versus social immunity. *Behav Ecol* 21, 663-668.
- 672 Cremer, S., Armitage, S.A., Schmid-Hempel, P., 2007. Social immunity. *Curr Biol* 17, R693-R702.
- 673 Cremer, S., Pull, C.D., Fuerst, M.A., 2018. Social immunity: emergence and evolution of colony-level  
674 disease protection. *Annu Rev Entomol* 63, 105-123.
- 675 Davis, H.E., Meconcelli, S., Radek, R., McMahon, D.P., 2018. Termites shape their collective behavioural  
676 response based on stage of infection. *Sci Rep* 8.

- 677 De Bie, T., Cristianini, N., Demuth, J.P., Hahn, M.W., 2006. CAFE: a computational tool for the study of  
678 gene family evolution. *Bioinformatics* 22, 1269-1271.
- 679 Donovan, S., Jones, D., Sands, W., Eggleton, P., 2000. Morphological phylogenetics of termites  
680 (Isoptera). *Biol J Linn Soc* 70, 467-513.
- 681 Emms, D.M., Kelly, S., 2015. OrthoFinder: solving fundamental biases in whole genome comparisons  
682 dramatically improves orthogroup inference accuracy. *Genome Biol* 16, 157.
- 683 Engel, M.S., Grimaldi, D.A., Krishna, K., 2007. Primitive termites from the early Cretaceous of Asia  
684 (Isoptera). *Stuttgarter Beitr. Naturk. Ser. B* 371, 32.
- 685 Engel, M.S., Grimaldi, D.A., Nascimbene, P.C., Singh, H., 2011. The termites of Early Eocene Cambay  
686 amber, with the earliest record of the Termitidae (Isoptera). *ZooKeys*, 105.
- 687 Esparza-Mora, M.A., Davis, H.E., Meconcelli, S., Plarre, R., McMahon, D.P., 2020. Inhibition of a secreted  
688 immune molecule interferes with termite social immunity. *Front Ecol Evol* 8, 75.
- 689 Evans, J., Aronstein, K., Chen, Y.P., Hetru, C., Imler, J.L., Jiang, H., Kanost, M., Thompson, G., Zou, Z.,  
690 Hultmark, D., 2006. Immune pathways and defence mechanisms in honey bees *Apis mellifera*. *Insect*  
691 *Mol Biol* 15, 645-656.
- 692 Fisher, R.M., Cornwallis, C.K., West, S.A., 2013. Group formation, relatedness, and the evolution of  
693 multicellularity. *Curr Biol* 23, 1120-1125.
- 694 Gao, Q., Thompson, G., 2015. Social context affects immune gene expression in a subterranean termite.  
695 *Insectes Soc* 62, 167-170.
- 696 Grabherr, M.G., Haas, B.J., Yassour, M., Levin, J.Z., Thompson, D.A., Amit, I., Adiconis, X., Fan, L.,  
697 Raychowdhury, R., Zeng, Q., 2011. Full-length transcriptome assembly from RNA-Seq data without a  
698 reference genome. *Nat Biotechnol* 29, 644-652.
- 699 Graeff, J., Jemielity, S., Parker, J.D., Parker, K.M., Keller, L., 2007. Differential gene expression between  
700 adult queens and workers in the ant *Lasius niger*. *Mol Ecol* 16, 675-683.
- 701 Grozinger, C.M., Fan, Y., Hoover, S.E., Winston, M.L., 2007. Genome - wide analysis reveals differences  
702 in brain gene expression patterns associated with caste and reproductive status in honey bees (*Apis*  
703 *mellifera*). *Mol Ecol* 16, 4837-4848.
- 704 Harpur, B.A., Guarna, M.M., Huxter, E., Higo, H., Moon, K.-M., Hoover, S.E., Ibrahim, A., Melathopoulos,  
705 A.P., Desai, S., Currie, R.W., 2019. Integrative genomics reveals the genetics and evolution of the honey  
706 bee's social immune system. *Genome Biol Evol* 11, 937-948.
- 707 Harrison, M.C., Arning, N., Kremer, L.P., Ylla, G., Belles, X., Bornberg - Bauer, E., Huylmans, A.K.,  
708 Jongepier, E., Piulachs, M.D., Richards, S., 2018. Expansions of key protein families in the German  
709 cockroach highlight the molecular basis of its remarkable success as a global indoor pest. *J Exp Zool B*  
710 *Mol Dev Evol*.
- 711 He, S., Johnston, P.R., Kuropka, B., Lokatis, S., Weise, C., Plarre, R., Kunte, H.J., McMahon, D.P., 2018.  
712 Termite soldiers contribute to social immunity by synthesizing potent oral secretions. *Insect Mol Biol* 27,  
713 564-576.
- 714 Hernández López, J., Riessberger - Gallé, U., Crailsheim, K., Schuehly, W., 2017. Cuticular hydrocarbon  
715 cues of immune - challenged workers elicit immune activation in honeybee queens. *Mol Ecol* 26, 3062-  
716 3073.
- 717 Hoffmann, J.A., Reichhart, J.M., 2002. *Drosophila* innate immunity: an evolutionary perspective. *Nat*  
718 *Immunol* 3, 121-126.
- 719 Hoggard, S.J., Wilson, P.D., Beattie, A.J., Stow, A.J., 2011a. Social complexity and nesting habits are  
720 factors in the evolution of antimicrobial defences in wasps. *PLoS One* 6, e21763.
- 721 Hoggard, S.J., Wilson, P.D., Beattie, A.J., Stow, A.J., 2011b. Social complexity and nesting habits are  
722 factors in the evolution of antimicrobial defences in wasps. *PLoS One* 6.
- 723 Husseneder, C., Simms, D.M., 2014. Effects of caste on the expression of genes associated with septic  
724 injury and xenobiotic exposure in the Formosan subterranean termite. *PLoS One* 9, e105582.

- 725 Inward, D., Beccaloni, G., Eggleton, P., 2007a. Death of an order: a comprehensive molecular  
726 phylogenetic study confirms that termites are eusocial cockroaches. *Biol Lett* 3, 331-335.
- 727 Inward, D.J., Vogler, A.P., Eggleton, P., 2007b. A comprehensive phylogenetic analysis of termites  
728 (Isoptera) illuminates key aspects of their evolutionary biology. *Mol Phylogenet Evol* 44, 953-967.
- 729 Jomori, T., Kubo, T., Natori, S., 1990. Purification and characterization of lipopolysaccharide - binding  
730 protein from hemolymph of American cockroach *Periplaneta americana*. *FEBS J* 190, 201-206.
- 731 Jomori, T., Natori, S., 1991. Molecular cloning of cDNA for lipopolysaccharide-binding protein from the  
732 hemolymph of the American cockroach, *Periplaneta americana*. Similarity of the protein with animal  
733 lectins and its acute phase expression. *J Biol Chem* 266, 13318-13323.
- 734 Jomori, T., Natori, S., 1992. Function of the lipopolysaccharide-binding protein of *Periplaneta americana*  
735 as an opsonin. *FEBS Lett* 296, 283-286.
- 736 Jones, B.M., Kingwell, C.J., Wcislo, W.T., Robinson, G.E., 2017. Caste-biased gene expression in a  
737 facultatively eusocial bee suggests a role for genetic accommodation in the evolution of eusociality.  
738 *Proceedings. Biological sciences* 284.
- 739 Kambhampati, S., Kjer, K., Thorne, B., 1996. Phylogenetic relationship among termite families based on  
740 DNA sequence of mitochondrial 16S ribosomal RNA gene. *Insect Mol Biol* 5, 229-238.
- 741 Kapheim, K.M., Pan, H., Li, C., Salzberg, S.L., Puiu, D., Magoc, T., Robertson, H.M., Hudson, M.E., Venkat,  
742 A., Fischman, B.J., 2015. Genomic signatures of evolutionary transitions from solitary to group living.  
743 *Science* 348, 1139-1143.
- 744 Katoh, K., Standley, D.M., 2013. MAFFT multiple sequence alignment software version 7: improvements  
745 in performance and usability. *Mol Biol Evol* 30, 772-780.
- 746 Keck, F., Rimet, F., Bouchez, A., Franc, A., 2016. phylosignal: an R package to measure, test, and explore  
747 the phylogenetic signal. *Ecol Evol* 6, 2774-2780.
- 748 Korb, J., Hartfelder, K., 2008. Life history and development - a framework for understanding  
749 developmental plasticity in lower termites. *Biol Rev* 83, 295-313.
- 750 Koshikawa, S., Miyazaki, S., Cornette, R., Matsumoto, T., Miura, T., 2008. Genome size of termites  
751 (Insecta, Dictyoptera, Isoptera) and wood roaches (Insecta, Dictyoptera, Cryptocercidae).  
752 *Naturwissenschaften* 95, 859.
- 753 Krishna, K., Grimaldi, D.A., 2003. The first Cretaceous Rhinotermitidae (Isoptera): A new species, genus,  
754 and subfamily in Burmese amber. *Am Mus Novit* 2003, 1-10.
- 755 Krishna, K., Grimaldi, D.A., Krishna, V., Engel, M.S., 2013. Treatise on the Isoptera of the World: volume 1  
756 Introduction. *Bull Am Mus Nat Hist* 3777, 200.
- 757 Kutsukake, M., Moriyama, M., Shigenobu, S., Meng, X.-Y., Nikoh, N., Noda, C., Kobayashi, S., Fukatsu, T.,  
758 2019. Exaggeration and cooption of innate immunity for social defense. *Proc Natl Acad Sci* 116, 8950-  
759 8959.
- 760 Lartillot, N., Philippe, H., 2004. A Bayesian mixture model for across-site heterogeneities in the amino-  
761 acid replacement process. *Mol Biol Evol* 21, 1095-1109.
- 762 Li, S., Zhu, S., Jia, Q., Yuan, D., Ren, C., Li, K., Liu, S., Cui, Y., Zhao, H., Cao, Y., Fang, G., Li, D., Zhao, X.,  
763 Zhang, J., Yue, Q., Fan, Y., Yu, X., Feng, Q., Zhan, S., 2018. The genomic and functional landscapes of  
764 developmental plasticity in the American cockroach. *Nat Commun* 9, 1008.
- 765 Lo, N., Eggleton, P., 2010. Termite phylogenetics and co-cladogenesis with symbionts, *Biology of*  
766 *termites: a modern synthesis*. Springer, pp. 27-50.
- 767 López-Urbe, M.M., Sconiers, W.B., Frank, S.D., Dunn, R.R., Tarpy, D.R., 2016. Reduced cellular immune  
768 response in social insect lineages. *Biol Lett* 12, 20150984.
- 769 Love, M.I., Huber, W., Anders, S., 2014. Moderated estimation of fold change and dispersion for RNA-  
770 seq data with DESeq2. *Genome Biol* 15, 550.
- 771 Michod, R.E., Herron, M.D., 2006. Cooperation and conflict during evolutionary transitions in  
772 individuality. *J Evolution Biol* 19, 1406-1409.

- 773 Mitaka, Y., Kobayashi, K., Matsuura, K., 2017. Caste-, sex-, and age-dependent expression of immune-  
774 related genes in a Japanese subterranean termite, *Reticulitermes speratus*. *PLoS One* 12, e0175417.
- 775 Mitaka, Y., Kobayashi, K., Mikheyev, A., Tin, M.M., Watanabe, Y., Matsuura, K., 2016. Caste-Specific and  
776 Sex-Specific Expression of Chemoreceptor Genes in a Termite. *PLoS One* 11, e0146125.
- 777 Nalepa, C.A., 2015. Origin of termite eusociality: trophallaxis integrates the social, nutritional, and  
778 microbial environments. *Ecol Entomol* 40, 323-335.
- 779 Naug, D., Camazine, S., 2002. The role of colony organization on pathogen transmission in social insects.  
780 *J Theor Biol* 215, 427-439.
- 781 Ohkuma, M., Noda, S., Hongoh, Y., Nalepa, C.A., Inoue, T., 2008. Inheritance and diversification of  
782 symbiotic trichonymphid flagellates from a common ancestor of termites and the cockroach  
783 *Cryptocercus*. *Philos Trans R Soc Lond B Biol Sci* 276, 239-245.
- 784 Otani, S., Bos, N., Yek, S.H., 2016. Transitional complexity of social insect immunity. *Front Ecol Evol* 4, 69.
- 785 Patro, R., Duggal, G., Love, M.I., Irizarry, R.A., Kingsford, C., 2017. Salmon provides fast and bias-aware  
786 quantification of transcript expression. *Nat Methods* 14, 417.
- 787 Pradeu, T., 2011. *The limits of the self: immunology and biological identity*. Oxford University Press.
- 788 Pradeu, T., 2019. *Philosophy of Biology: Immunology and individuality*. *Elife* 8, e47384.
- 789 Pull, C.D., McMahon, D.P., 2020. Superorganism Immunity: A Major Transition in Immune System  
790 Evolution. *Front Ecol Evol* 8, 186.
- 791 Pull, C.D., Ugelvig, L.V., Wiesenhofer, F., Grasse, A.V., Tragust, S., Schmitt, T., Brown, M.J., Cremer, S.,  
792 2018. Destructive disinfection of infected brood prevents systemic disease spread in ant colonies. *Elife* 7,  
793 e32073.
- 794 Quque, M., Benhaim-Delarbre, M., Deneubourg, J.-L., Sueur, C., Criscuolo, F., Bertile, F., 2019. Division of  
795 labour in the black garden ant (*Lasius niger*) leads to three distinct proteomes. *J Insect Physiol* 117,  
796 103907.
- 797 Radyuk, S.N., Klichko, V.I., Spinola, B., Sohal, R.S., Orr, W.C., 2001. The peroxiredoxin gene family in  
798 *Drosophila melanogaster*. *Free Radic Biol Med* 31, 1090-1100.
- 799 Rolff, J., Reynolds, S., 2009. *Insect infection and immunity: evolution, ecology, and mechanisms*. Oxford  
800 university press, Oxford.
- 801 Rosengaus, R., Jordan, C., Lefebvre, M., Traniello, J., 1999. Pathogen alarm behavior in a termite: a new  
802 form of communication in social insects. *Naturwissenschaften* 86, 544-548.
- 803 Rosengaus, R.B., Traniello, J.F., Bulmer, M.S., 2010. Ecology, behavior and evolution of disease  
804 resistance in termites, *Biology of termites: a modern synthesis*. Springer, pp. 165-191.
- 805 Sackton, T.B., Lazzaro, B.P., Clark, A.G., 2017. Rapid expansion of immune-related gene families in the  
806 house fly, *Musca domestica*. *Mol Biol Evol* 34, 857-872.
- 807 Scharf, M.E., Wu-Scharf, D., Pittendrigh, B.R., Bennett, G.W., 2003. Caste- and development-associated  
808 gene expression in a lower termite. *Genome Biol* 4.
- 809 Simão, F.A., Waterhouse, R.M., Ioannidis, P., Kriventseva, E.V., Zdobnov, E.M., 2015. BUSCO: assessing  
810 genome assembly and annotation completeness with single-copy orthologs. *Bioinformatics* 31, 3210-  
811 3212.
- 812 Smith, J.M., Szathmary, E., 1997. *The major transitions in evolution*. Oxford University Press.
- 813 Smith, S.A., Dunn, C.W., 2008. Phyutility: a phyloinformatics tool for trees, alignments and molecular  
814 data. *Bioinformatics* 24, 715-716.
- 815 Stamatakis, A., 2014. RAxML version 8: a tool for phylogenetic analysis and post-analysis of large  
816 phylogenies. *Bioinformatics* 30, 1312-1313.
- 817 Stow, A., Briscoe, D., Gillings, M., Holley, M., Smith, S., Leys, R., Silberbauer, T., Turnbull, C., Beattie, A.,  
818 2007. Antimicrobial defences increase with sociality in bees. *Biol Lett* 3, 422-424.
- 819 Stroeymeyt, N., Grasse, A.V., Crespi, A., Mersch, D.P., Cremer, S., Keller, L., 2018. Social network  
820 plasticity decreases disease transmission in a eusocial insect. *Science* 362, 941-945.

- 821 Supek, F., Bošnjak, M., Škunca, N., Šmuc, T., 2011. REVIGO summarizes and visualizes long lists of gene  
822 ontology terms. PLoS One 6, e21800.
- 823 Terrapon, N., Li, C., Robertson, H.M., Ji, L., Meng, X., Booth, W., Chen, Z., Childers, C.P., Glastad, K.M.,  
824 Gokhale, K., 2014. Molecular traces of alternative social organization in a termite genome. Nat Commun  
825 5, 3636.
- 826 Turnbull, C., Hoggard, S., Gillings, M., Palmer, C., Stow, A., Beattie, D., Briscoe, D., Smith, S., Wilson, P.,  
827 Beattie, A., 2010. Antimicrobial strength increases with group size: implications for social evolution. Biol  
828 Lett 7, 249-252.
- 829 Turnbull, C., Hoggard, S., Gillings, M., Palmer, C., Stow, A., Beattie, D., Briscoe, D., Smith, S., Wilson, P.,  
830 Beattie, A., 2011. Antimicrobial strength increases with group size: implications for social evolution. Biol  
831 Lett 7, 249-252.
- 832 Turnbull, C., Wilson, P.D., Hoggard, S., Gillings, M., Palmer, C., Smith, S., Beattie, D., Hussey, S., Stow, A.,  
833 Beattie, A., 2012. Primordial enemies: fungal pathogens in thrips societies. PLoS One 7, e49737.
- 834 Velenovsky, J.F., Kalisch, J., Bulmer, M.S., 2016. Selective sweeps in *Cryptocercus* woodroach antifungal  
835 proteins. Genetica 144, 547-552.
- 836 Vršanský, P., 2002. Origin and the early evolution of mantises. Amba Proj 6, 1-16.
- 837 Zhang, Z.T., Zhu, S.Y., 2009. Drosomycin, an essential component of antifungal defence in *Drosophila*.  
838 Insect Mol Biol 18, 549-556.
- 839 Zhu, Y., Yu, X., Cheng, G., 2020. Insect C-Type Lectins in Microbial Infections, Lectin in Host Defense  
840 Against Microbial Infections. Springer, pp. 129-140.

841 **Acknowledgments:** we acknowledge the high-performance computing service of the ZEDAT of  
842 the Freie Universität Berlin for providing allocations of computing time and the Berlin Center for  
843 Genomics in Biodiversity Research (BeGenDiv) for providing transcriptome sequencing  
844 assistance. We thank Jens Rolff, Renate Radek, Sophie Armitage for giving enormous advice  
845 and comments on the study. We appreciate Michael T. Monaghan for his advice on phylogenetic  
846 analysis. **Funding:** This study was supported by Freie University Internal Research Funding to  
847 D.P.M., S. H., P. S. and J. S. are supported by "EVA4.0" (No.  
848 CZ.02.1.01/0.0/0.0/16\_019/0000803, financed by OP RDE) and P. S., J. S. are supported by  
849 CIGA No. 20184306 (Czech University of Life Sciences, Prague).

850 **Author contributions:** D. P. M. and P. R. J. conceived this study. S. H. and T. S. conducted the  
851 experiments. S. H., P. R. J. and D. P. M. analyzed the data. D. P. M. and S. H. wrote the  
852 manuscript. All authors contributed to the writing of the manuscript.

853 **Competing interests:** Authors declare no competing interests.

854 **Data and materials availability:** All raw data associated with the study are available under  
855 BioProject PRJNA635910. All codes associated with the study are available at the repository  
856 <https://github.com/EvoEcolmm/TheEvolutionofTermitImmunity>.

857 **Additional Information: Supplementary Information** is available for this paper.  
858 Correspondence and requests for materials should be addressed to Dino P. McMahon [peter.mcmahon@bam.de](mailto:dino-<br/>859 peter.mcmahon@bam.de).

860



861 **Figure captions**

862 **Fig. 1.** Phylogeny of termites and cockroaches alongside total numbers of identified immune genes. Gene  
863 family names in grey and black on the phylogeny indicate significant contractions and expansions of  
864 individual gene families, respectively. The gene family evolution analysis was conducted in CAFE.  
865 Significance levels of 0.05 (\*) and 0.01 (\*\*) are shown.

866 **Fig. 2.** Predicted gene numbers in 50 immune gene families from 18 termite and cockroach species. \*:  
867 Gene sets of sequenced genomes were used to verify immune gene predictions from our *de novo*  
868 transcriptomic data. Columns in bold indicate the number of immune genes estimated from gene sets  
869 derived from sequenced genome.

870 **Fig. 3.** Individual immune response following injection with a cocktail of heat-killed microorganisms versus  
871 an equivalent Ringer's solution. a) Bland-Altman (MA) plots of gene expression in *B. orientalis* and  
872 *C. meridianus* (upper panel) or each caste of *N. castaneus*: FW: false workers, S: soldiers, R: reproductives.  
873 Red dots in graphs represents differentially expressed genes. b) Cross-species comparison of total number  
874 of significantly induced immune genes following experimental injection. Bars in grey, red and blue represent  
875 the solitary cockroach, *B. orientalis*, the subsocial cockroach, *C. meridianus*, and the social termite, *N.*  
876 *castaneus*, respectively. FW: false workers, S: soldiers, R: reproductives. Gene families are categorized  
877 from left to right into immune effectors, receptors and signaling genes, respectively.

878 **Fig. 4.** a) A representative diagram of the social group experiment, indicating the design applied to the  
879 cockroach *B. orientalis* (upper panel) and the termite *N. castaneus* (lower panel). Individuals marked in  
880 grey represent focal individuals challenged by injection with a cocktail of heat-killed microorganisms, or an  
881 equivalent Ringer's control solution. After introduction of injected individuals into social groups, 2 random  
882 conspecifics of the injected cockroaches, and all the nestmates of injected termites were sampled for  
883 differential gene expression analysis. FW: false workers, S: soldiers, R: reproductives. b) Bland-Altman  
884 (MA) plots of gene expression in *B. orientalis* conspecifics (upper panel) or each caste of *N. castaneus*  
885 nestmates following exposure to treated focal individuals (lower panel, from left to right: FW: false workers,  
886 S: soldiers, R: reproductives). Red dots in graphs represents the differentially expressed genes. c) Principle

887 component analysis (PCA) of total immune gene expression across all three castes of *N. castaneus* from  
888 the social experiment, with points in red indicating social groups exposed to immune-challenged focal  
889 individuals. d) A heatmap of differentially expressed immune genes following pairwise comparisons among  
890 castes. The comparisons were conducted in DESeq2. Expression levels of genes with up-pointing triangles  
891 are significantly higher than genes indicated in down-pointing triangles whereas genes with triangles  
892 pointing in the same direction pointing indicate non-significance. Gene marked with both an up- and down-  
893 pointing triangle are significantly differentially expressed compared with both other castes, whereas genes  
894 lacking a triangle are not significantly differentially expressed compared with both other castes.

895

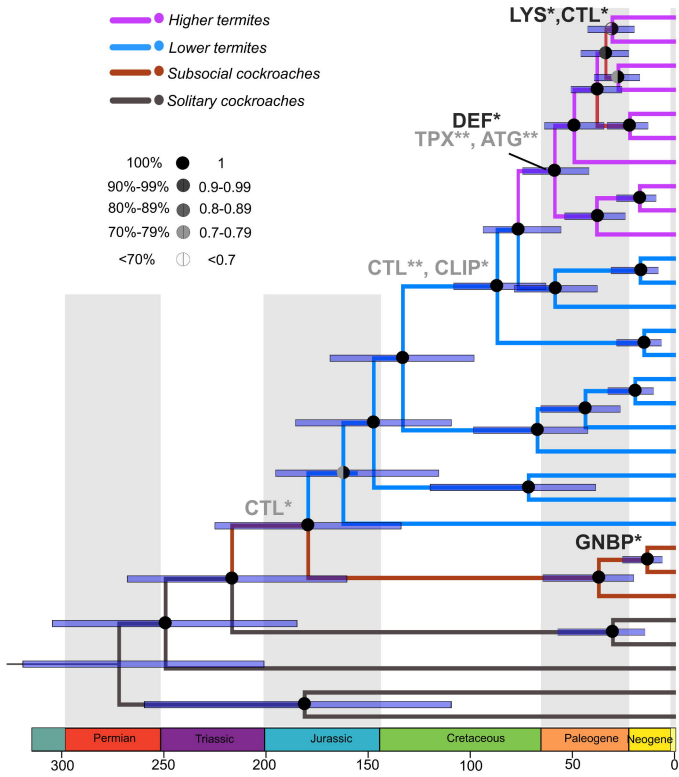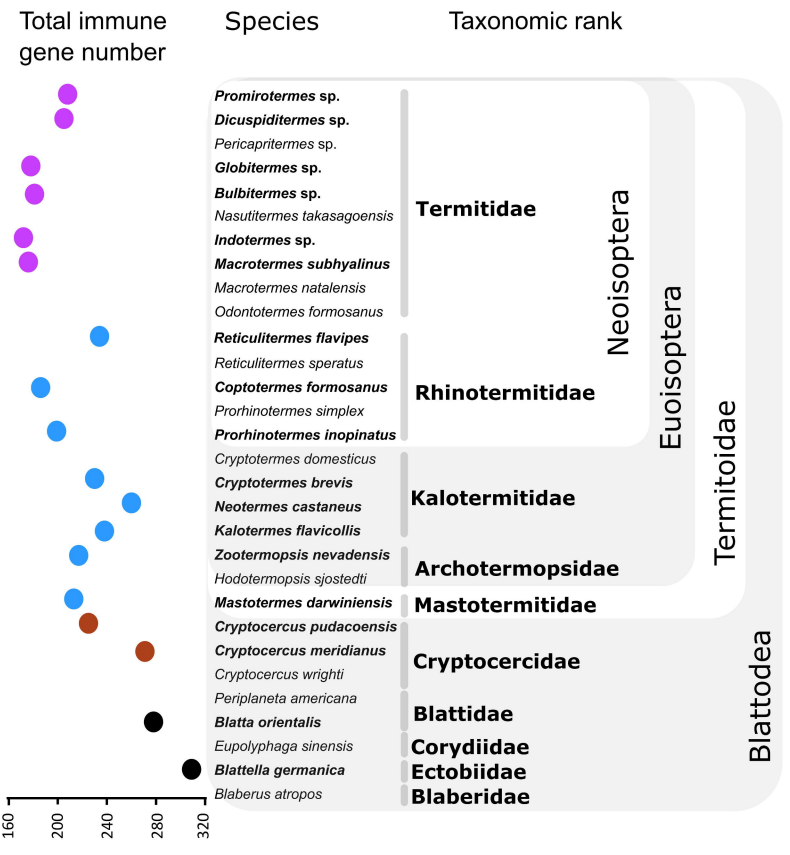

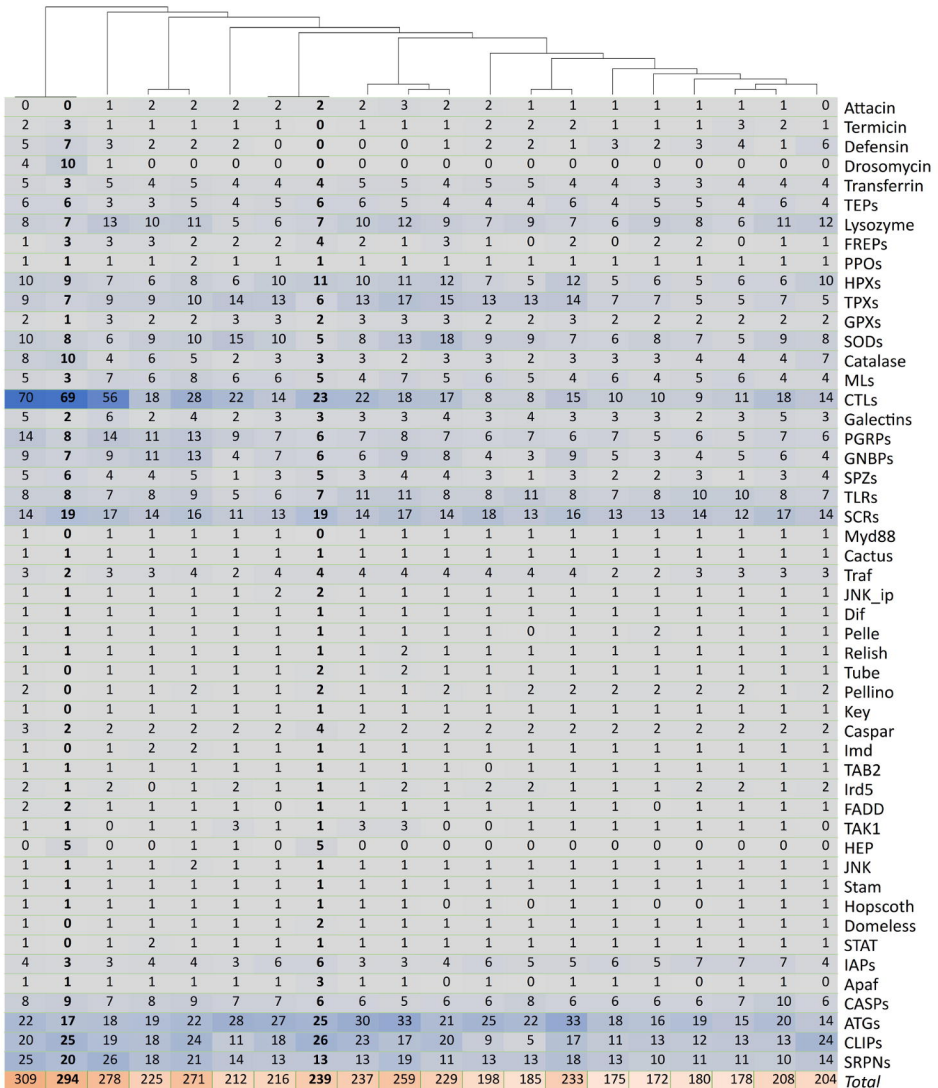

*Blattella germanica*  
***Blattella germanica*\***  
*Blattella orientalis*  
*Cryptocercus pudacensis*  
*Cryptocercus meridanus*  
*Mastotermes darwiniensis*  
*Zootermopsis nevadensis*  
***Zootermopsis nevadensis*\***  
*Kaloterme flavicollis*  
*Neotermes castaneus*  
*Cryptotermes brevis*  
*Prorehiotermes inopinatatus*  
*Coptotermes formosanus*  
*Reticulitermes flavipes*  
*Macrotermes subhyalinus*  
*Indotermes sp.*  
*Bulbitermes sp.*  
*Globitermes sp.*  
*Dicuspiditermes sp.*  
*Promiretermes sp.*

Attacin  
 Termicin  
 Defensin  
 Drosomycin  
 Transferrin  
 TEPs  
 Lysozyme  
 FREPs  
 PPOs  
 HPXs  
 TPXs  
 GPXs  
 SODs  
 Catalase  
 MLs  
 CTLs  
 Galectins  
 PGRPs  
 GNBPs  
 SPZs  
 TLRs  
 SCRs  
 Myd88  
 Cactus  
 Traf  
 JNK\_ip  
 Dif  
 Pelle  
 Relish  
 Tube  
 Pellino  
 Key  
 Caspar  
 lmd  
 TAB2  
 Ird5  
 FADD  
 TAK1  
 HEP  
 JNK  
 Stam  
 Hopscotch  
 Domeless  
 STAT  
 IAPs  
 Apaf  
 CASPs  
 ATGs  
 CLIPs  
 SRPNs  
 Total

(a)

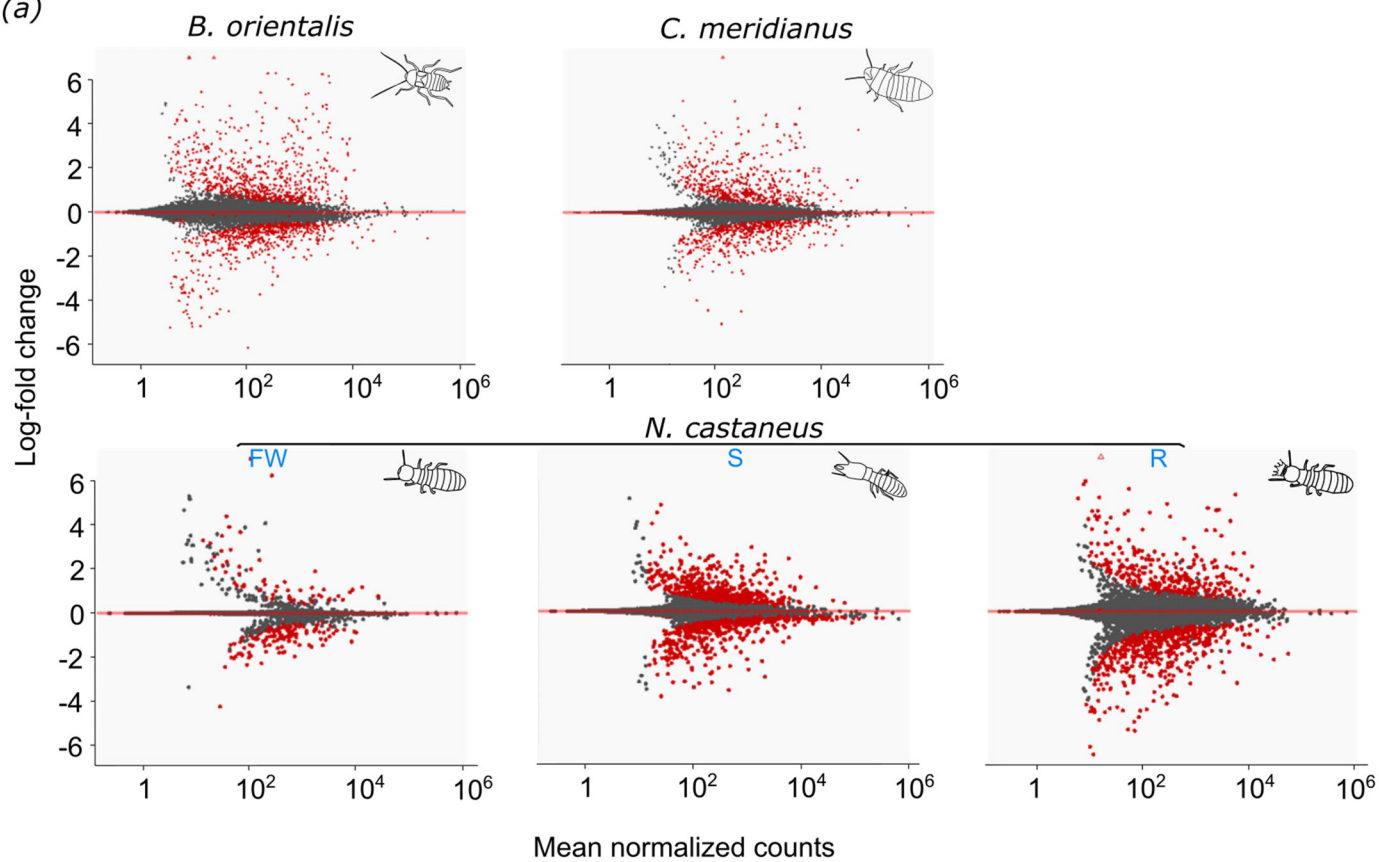

(b)

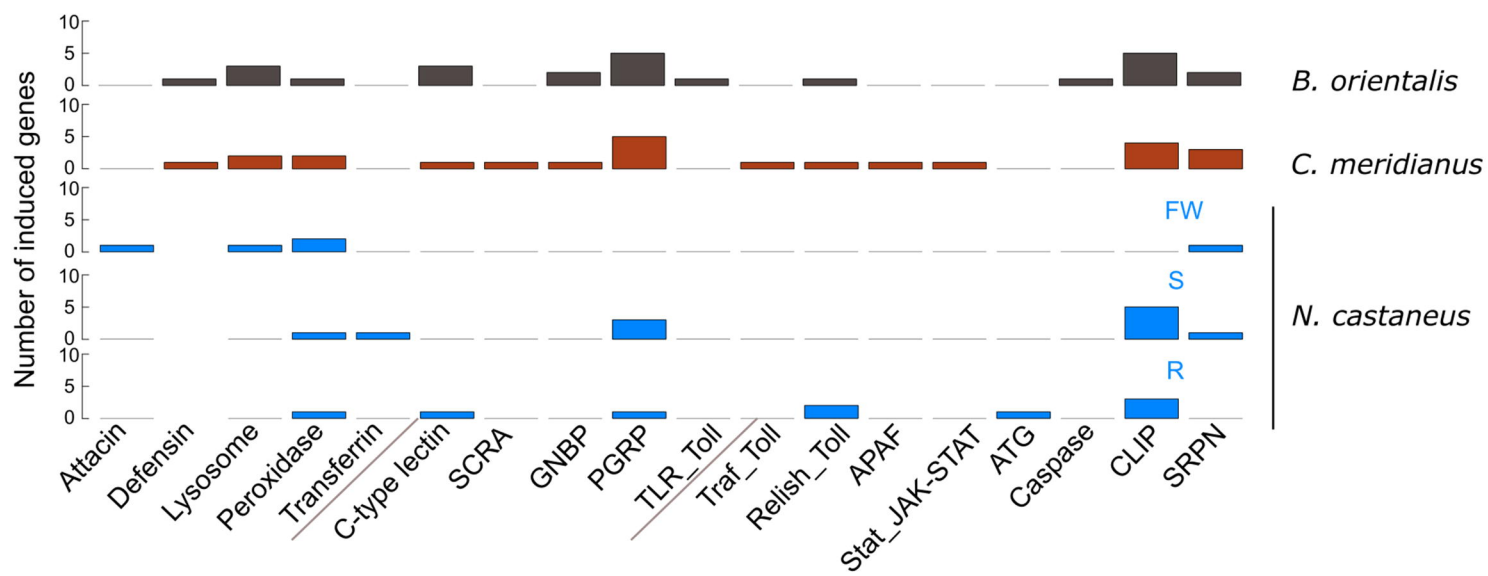

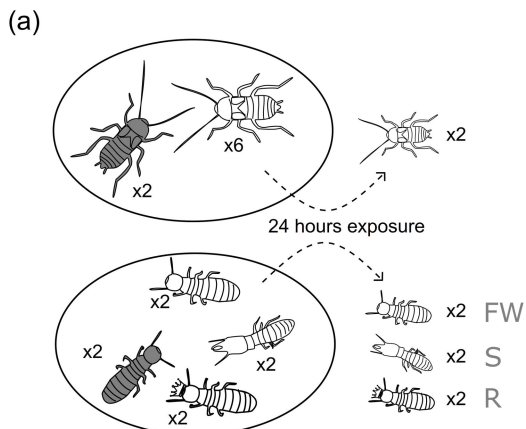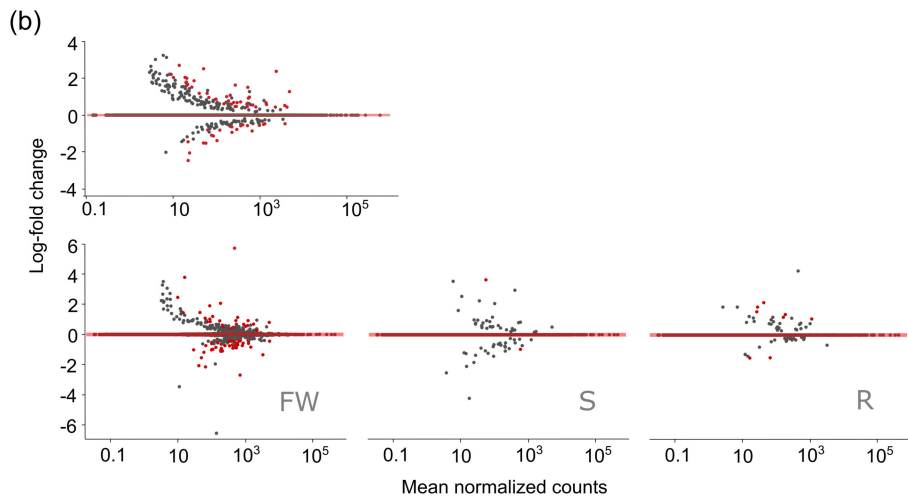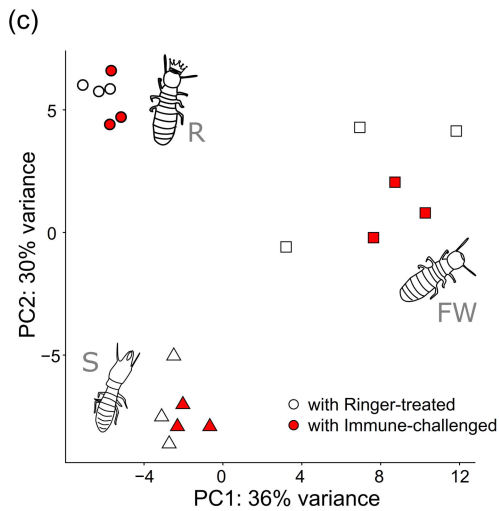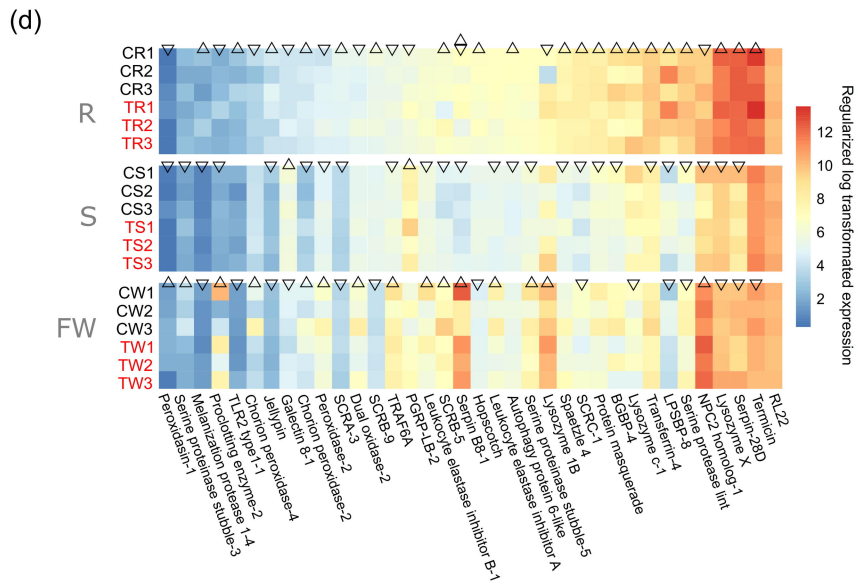

Source: https://www.biorxiv.org/content/10.1101/2020.07.09.192013v1.full.pdf
